# Supplementary material for: Neuroinflammation causes mitral cell dysfunction and olfactory impairment in a multiple sclerosis model
Source: Springer Nature journal article supplement (doi:10.1186/s12974-025-03388-5), 2025-03-08
Supplement: MOESM1 [file 12974_2025_3388_MOESM1_ESM.pdf]

## SUPPLEMENTAL MATERIAL

### **Neuroinflammation causes mitral cell dysfunction and olfactory impairment in a multiple sclerosis model**

**Charlotte Schubert<sup>1</sup>, Kristina Schulz<sup>2</sup>, Jana K. Sonner<sup>1</sup>, Alexandros Hadjilaou<sup>1,3</sup>, Anna-Lena Seemann<sup>1,2</sup>, Janine Gierke<sup>2</sup>, Vanessa Vieira<sup>1</sup>, Nina Meurs<sup>1</sup>, Marcel S. Woo<sup>1</sup>, Christian Lohr<sup>2</sup>, Fabio Morellini<sup>4</sup>, Daniela Hirnet<sup>2,5</sup>, Manuel A. Frieze<sup>1,5,\*</sup>**

<sup>1</sup>Institute of Neuroimmunology and Multiple Sclerosis (INIMS), University Medical Center Hamburg-Eppendorf, Hamburg, Germany

<sup>2</sup>Institute of Cell and Systems Biology of Animals, University of Hamburg, Hamburg, Germany

<sup>3</sup>Protozoa Immunology, Bernhard Nocht Institute for Tropical Medicine, Hamburg, Germany.

<sup>4</sup>Research Group Behavioral Biology, Center for Molecular Neurobiology (ZMNH), University Medical Center Hamburg-Eppendorf, Hamburg, Germany

<sup>5</sup>These authors contributed equally

\*Correspondence: manuel.frieze@zmnh.uni-hamburg.de

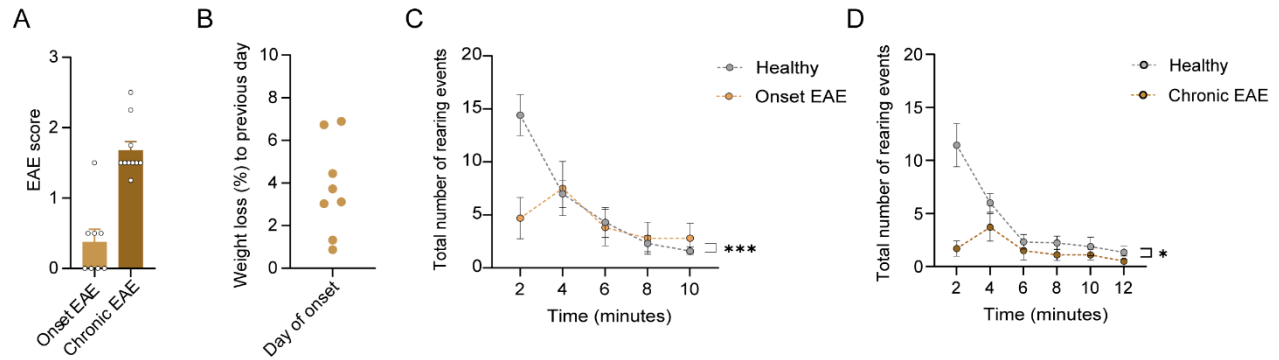

**Fig. S1 EAE leads to impairment in olfaction during EAE.**

(A) EAE score at time of behavioral testing at onset of EAE (d9 p.i.,  $n = 8$ ) and chronic EAE (d25 p.i.,  $n = 10$ ).  
 (B) Weight loss at the day of behavioral testing at onset of EAE in percent to the previous day ( $n = 8$ ).  
 (C) Number of rearing events in healthy mice and EAE mice at disease onset (EAE score  $\leq 1.5$  and detectable weight loss.  $n = 10$  per group).  
 (D) Number of rearing events during TMT-based olfactory detection test analyzed in bins of 2 minutes in healthy mice ( $n = 9$ ) and in EAE mice at chronic stage of EAE (d25 p.i.,  $n = 10$ ). Statistics were performed by REML mixed-effects model with Šidák multiple comparison; \* $P < 0.05$ . \*\*\* $P < 0.001$ .

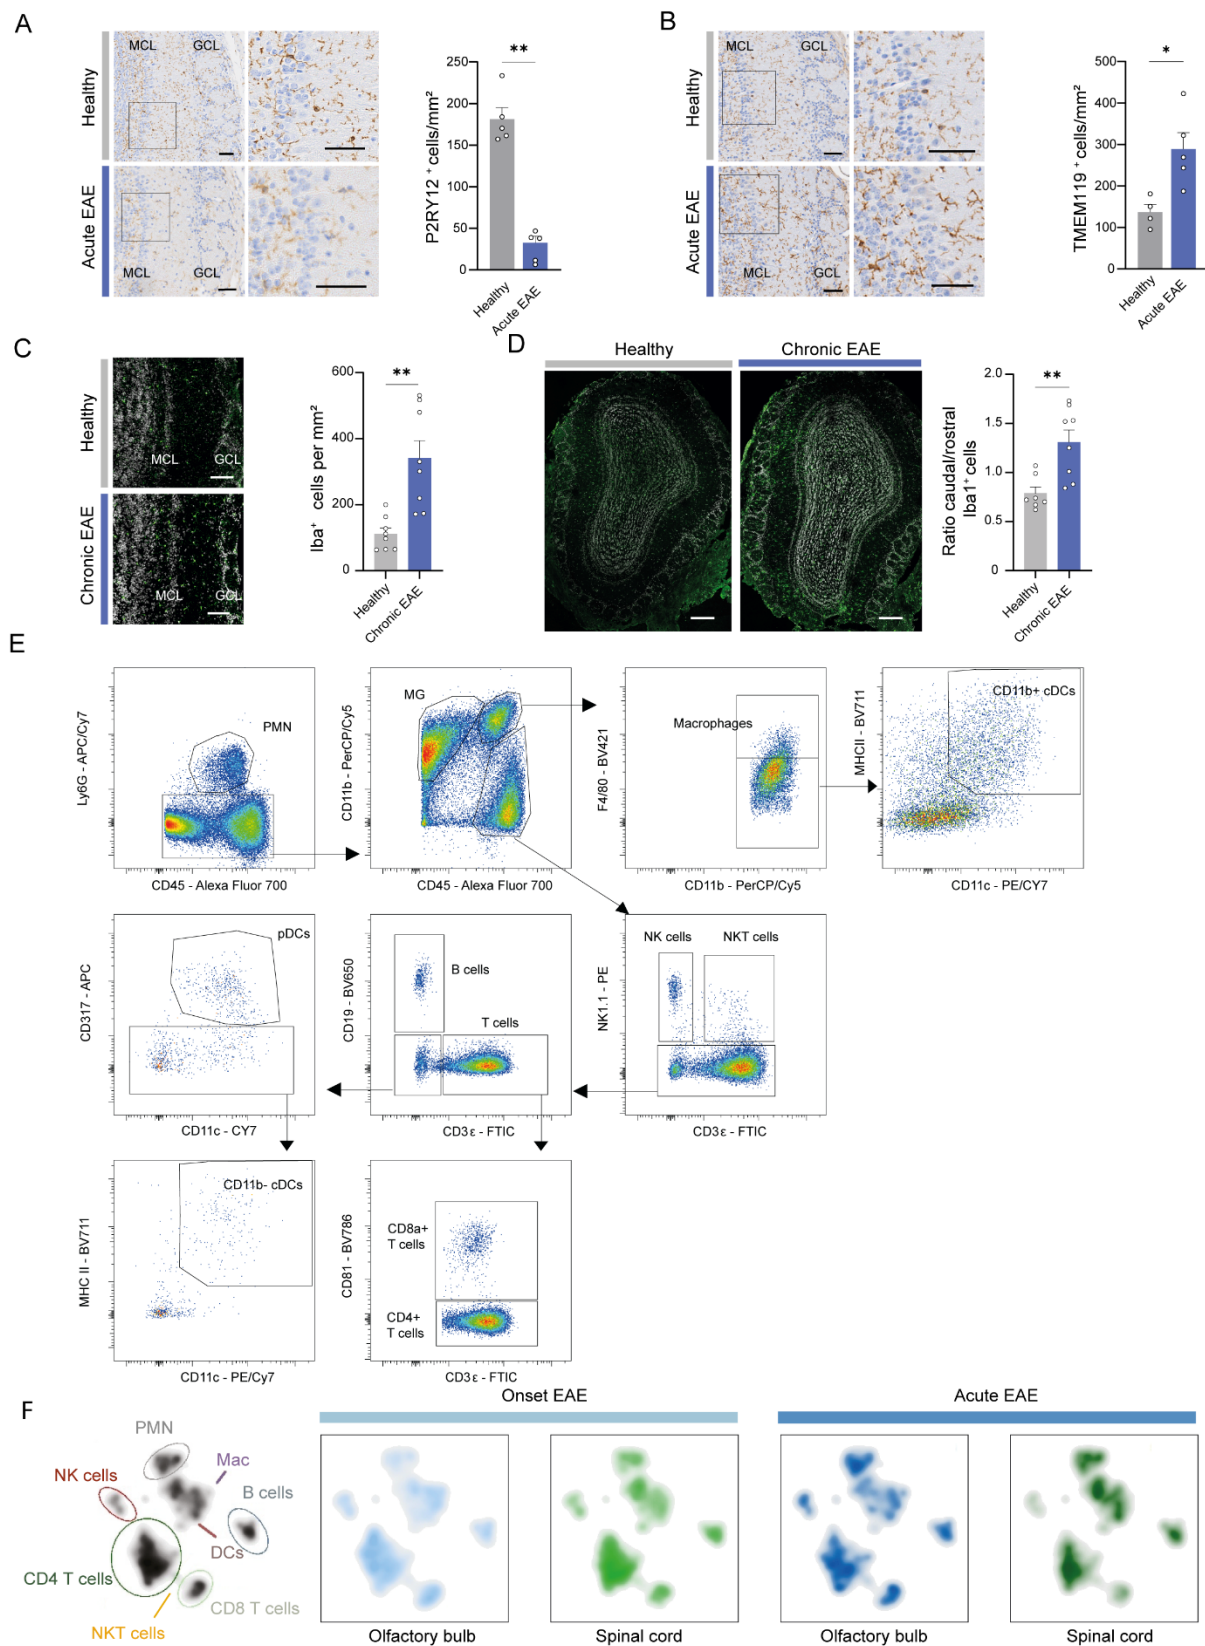

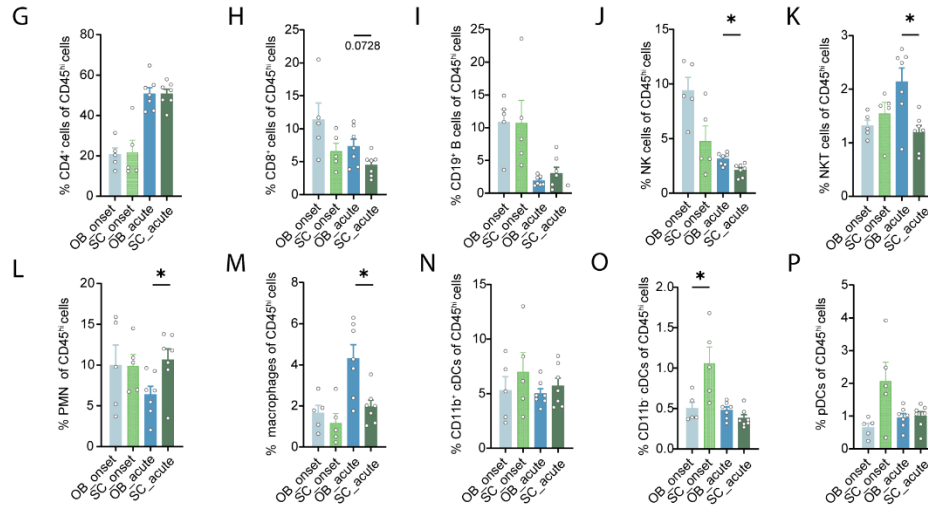

**Fig. S2 Immune cell infiltration and glial cell activation in the olfactory bulb during EAE.**

(A) Representative image with zoom-in (enlarged section displayed by frame in overview image) and quantification of per mm<sup>2</sup> of P2Y12<sup>+</sup> microglia in the main olfactory bulb (coronar orientation) in healthy mice and at the acute phase of EAE (d15 p.i.) ( $n = 5$  per group). Scale bar = 50  $\mu$ m.

(B) Representative image with zoom-in (enlarged section displayed by frame in overview image) and quantification of per mm<sup>2</sup> of TMEM119<sup>+</sup> cells in the main olfactory bulb (coronar orientation) in healthy mice and at the acute phase of EAE (d15 p.i.) ( $n = 5$  per group). Scale bar = 50  $\mu$ m.

(C) Representative images with zoom-in (enlarged section displayed by frame in overview image) and quantification of Iba1<sup>+</sup> cells per mm<sup>2</sup> of olfactory bulb in healthy animals ( $n = 5$ ) and chronic EAE (d30 p.i.) ( $n = 5$ ). IBA1 signal depicted in green. DAPI staining in grey. Scale bars = 100  $\mu$ m.

(D) Ratio of Iba1<sup>+</sup> cells in the caudal half of the olfactory bulb coronar sections in comparison to the rostral part in healthy animals and the chronic stage of EAE (d30 p.i.). IBA1 signal depicted in green. DAPI staining in grey. Scale bars = 200  $\mu$ m.

(E) Gating strategy of analyzed olfactory bulb and spinal cord infiltrating immune cells by flow cytometry. Polymorphonuclear neutrophils = PMN. MG = Microglia. CD11b<sup>+</sup> and CD11b<sup>-</sup> conventional dendritic cells = cDCs. plasmacytoid dendritic cells = pDC. CD8<sup>+</sup> T cells are referred to as CD4<sup>+</sup> T cells, as they are the vast majority comprising this cluster.

(F) UMAP plots of infiltrating immune cells merged, at onset of EAE (d9 p.i.) ( $n = 5$ ) and at acute EAE (d14 p.i.) ( $n = 7$ ) in the olfactory bulb as well as spinal cord. The UMAP of infiltrating immune cells in the olfactory bulb at acute EAE is also shown in Figure 2.

(G–P) Frequency of infiltrating immune cells in relation to CD45 high expressing cells (CD45<sup>hi</sup>) in the olfactory bulb and spinal cord. Shown are CD4<sup>+</sup> T cells (E) and CD8<sup>+</sup> T cells (F). CD19<sup>+</sup> B cells (G). NK cells (H). NKT cells (I). PMN (J). macrophages (K). CD11b<sup>+</sup> cDCs (L). and CD11b<sup>-</sup> cDCs (M) and pDCs (N) at onset of EAE (d9 p.i.) and acute EAE (d14 p.i.). Bars show mean values  $\pm$  s.e.m. Statistical analysis was performed by Mann-Whitney U-Test; \* $P < 0.05$ . \*\* $P < 0.01$ .



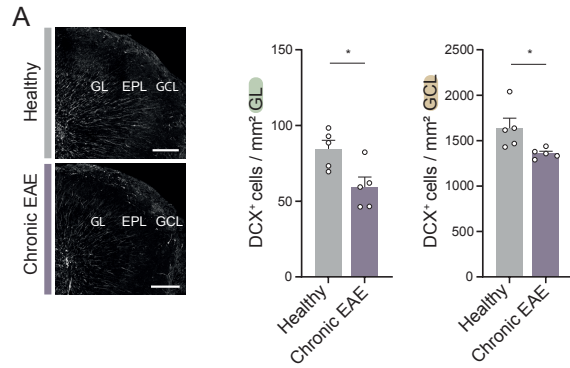

**Fig. S3 Structural analyses show cell-type specific neuronal vulnerability during EAE.**

**(A)** Representative images and quantification of DCX+ cells per mm² in healthy animals and chronic EAE (d30 p.i.) analyzed in the glomerular layer (GL) and granular cell layer (GCL) ( $n = 5$  per group). Scale bars = 100µm. Bars show mean values  $\pm$  s.e.m. Statistical analysis was performed by Mann-Whitney U-Test;  $*P < 0.05$ .

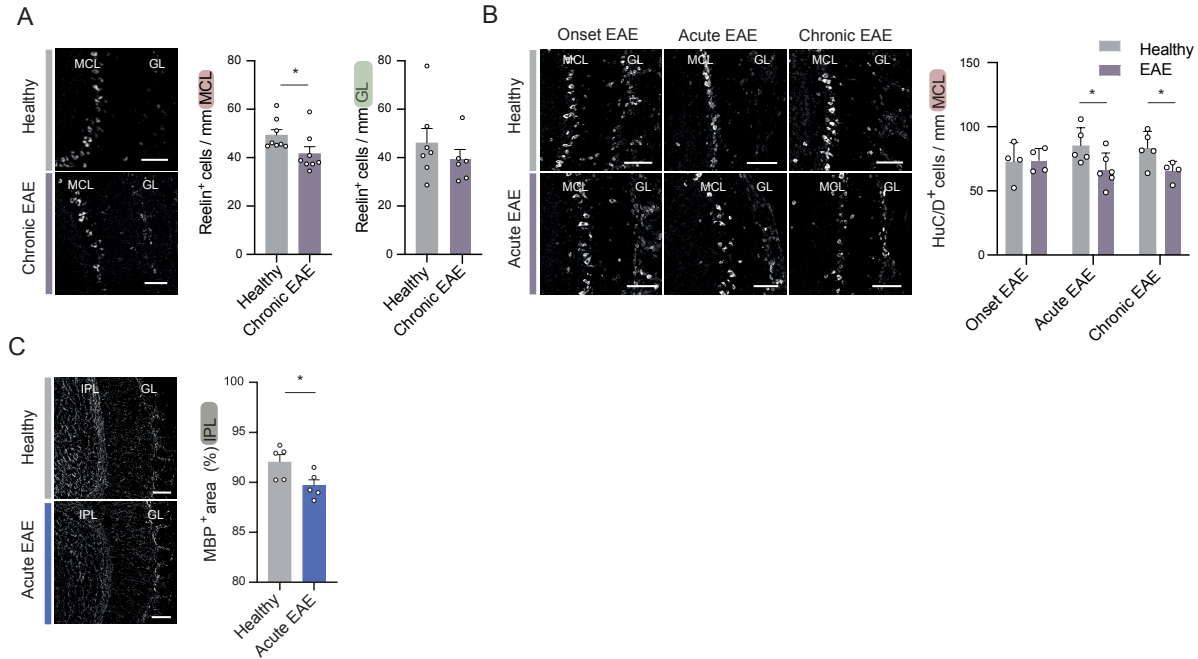

**Fig. S4 Mitral cells are specifically susceptible to neuroinflammation in EAE.**

**(A)** Representative images and quantification of Reelin<sup>+</sup> cells per mm mitral cell layer (MCL) and glomerular layer (GL) in chronic EAE mice (d30 p.i.) in comparison to healthy control mice (MC:  $n = 8$  per group; GL healthy:  $n = 7$ ; GL chronic EAE:  $n = 6$ ). The healthy control group is identical to that in Fig. 4A. Four healthy animals were sacrificed at the time point equivalent to EAE d15 p.i., and four healthy animals were sacrificed at the time point equivalent to EAE d30 p.i. Scale bars = 100  $\mu$ m.

**(B)** Representative images and quantification of HuC/D<sup>+</sup> cells per mm mitral cell layer (MCL) at onset of EAE (d9 p.i.,  $n = 4$ ), acute stage of EAE (d15 p.i.,  $n = 5$ ) and chronic EAE (d30 p.i.,  $n = 5$ ) and corresponding healthy control animals ( $n = 4$ ,  $n = 5$ ,  $n = 5$ , respectively) analyzed in the glomerular cell layer (GL) and granular cell layer (GCL). Scale bars = 100  $\mu$ m.

**(C)** Representative images and quantification of the MBP<sup>+</sup> area in the inner plexiform layer (IPL) of the olfactory bulb ( $n = 5$  per group). Scale bars = 100  $\mu$ m.

Bars show mean values  $\pm$  s.e.m. Statistical analysis was performed by Mann-Whitney U-Test;  $*P < 0.05$ .

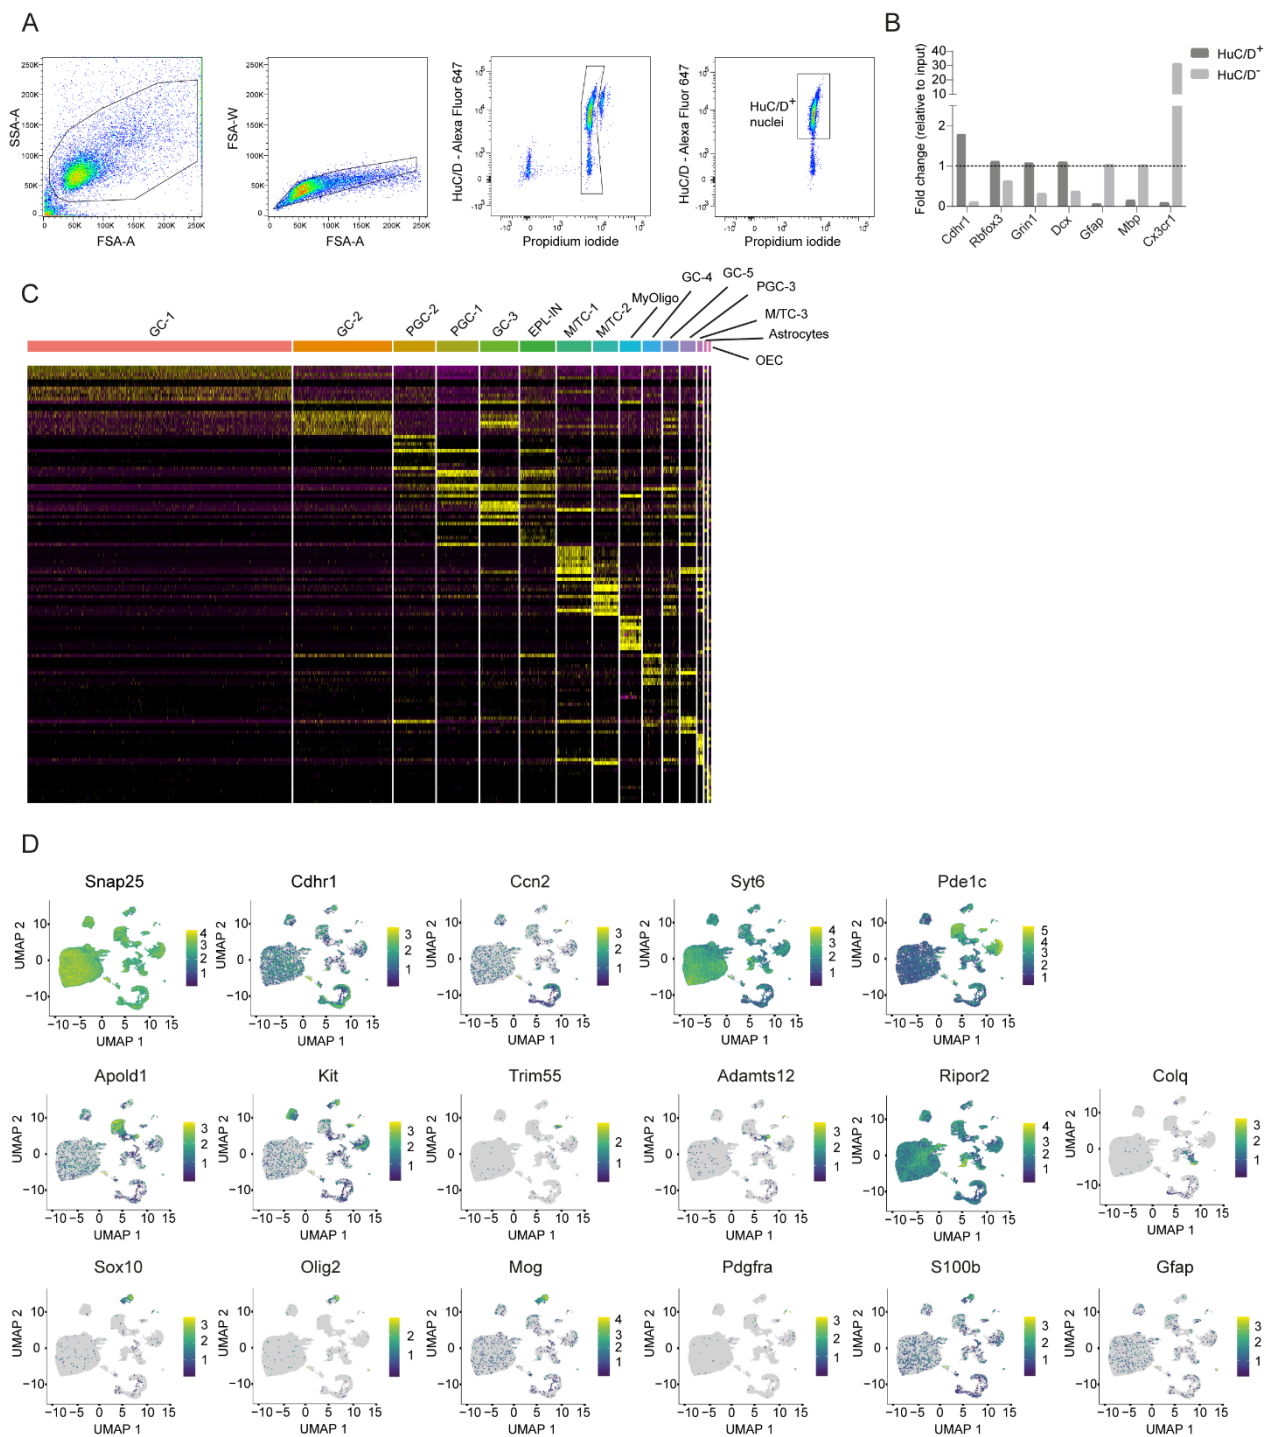

**Fig. S5 SnRNA-Seq of the olfactory bulb reveals a heterogeneity of neuronal cell types**

(A) Gating strategy of cell sorting of HuC/D<sup>+</sup> nuclei for snRNA-Seq.

(B) Relative mRNA expression of neuronal (*Cdhr1*, *Rbfox3*, *Grin1*, *Dcx*) and non-neuronal (*Gfap*, *Mbp*, *Cxcr1*) marker genes of cell sorted HuC/D<sup>+</sup> and HuC/D<sup>-</sup> nuclei ( $n = 1$  per group, similar results were obtained in two other validation experiments).

(C) Heatmap of marker genes of the 15 cell clusters obtained by snRNA-Seq of HuC/D<sup>+</sup> nuclei of the olfactory bulb of healthy animals and at the acute EAE stage (d15 p.i.,  $n = 3$  per group).

(D) Feature plot of additional genes of interest visualized by UMAP.

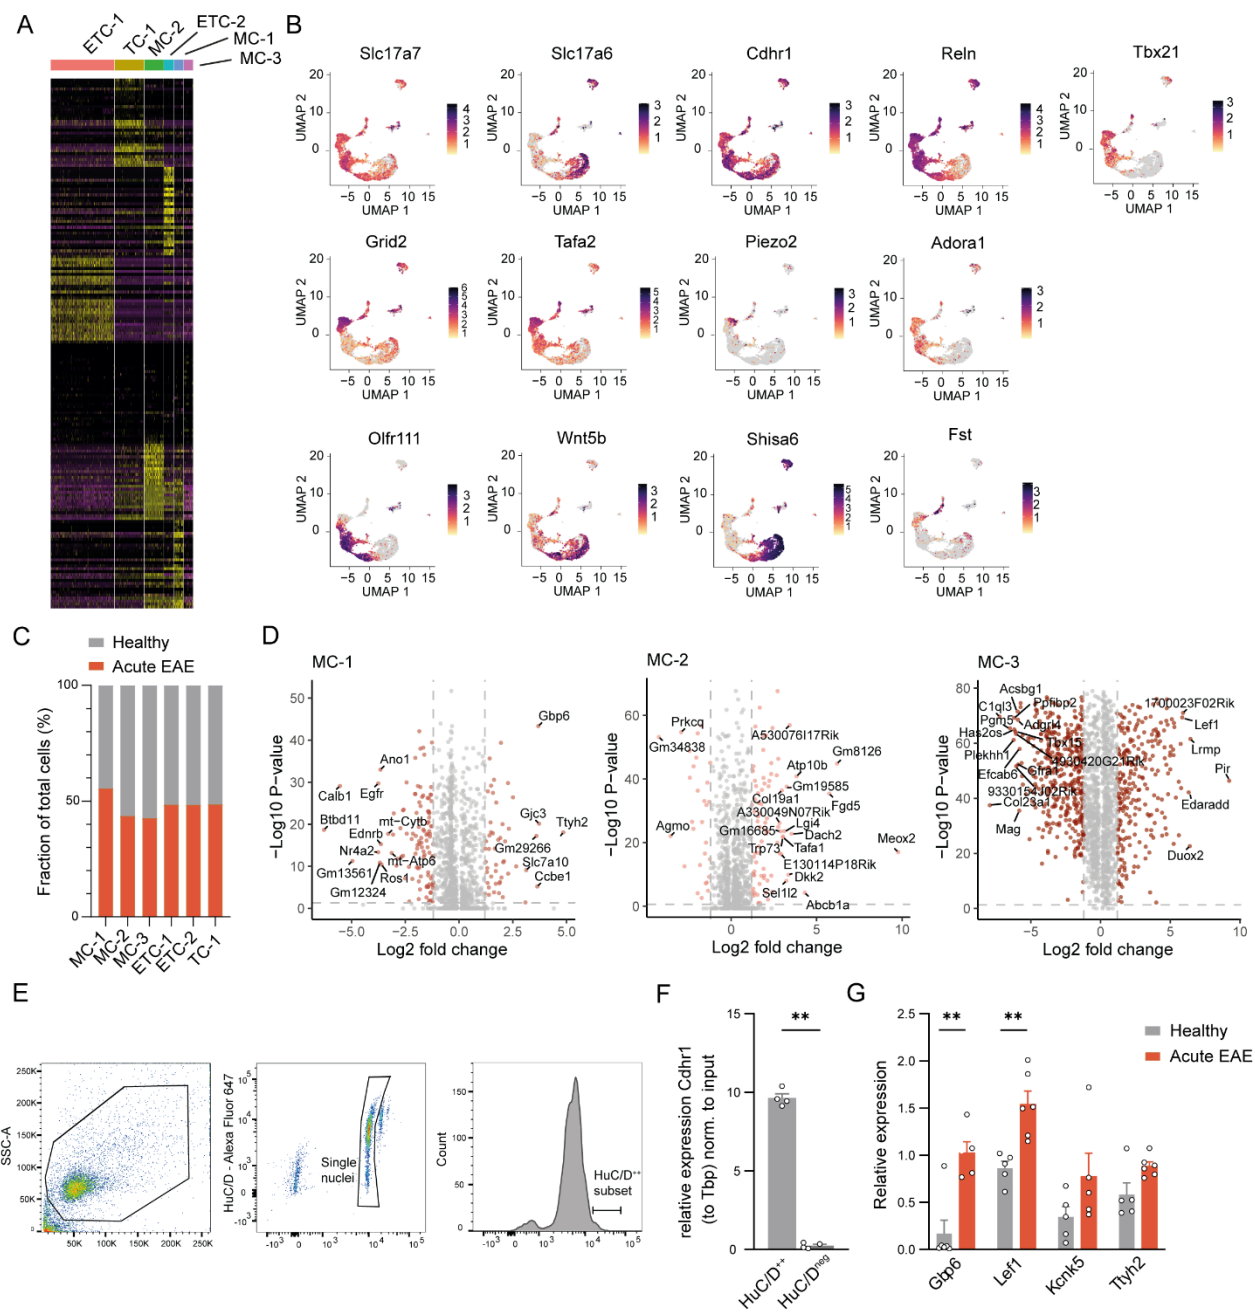

**Fig. S6 SnRNA-Seq shows changes in ion channel expression in mitral cells during EAE**

(A) Heatmap of marker genes of the six subclusters of healthy animals and at the acute EAE stage (d15 p.i.,  $n = 3$  per group).

(B) Validation by genes of interest in the six subcluster visualized by UMAP.

(C) Fraction of total cells in the olfactory bulb per cluster in healthy mice and acute EAE mice (d15 p.i.) ( $n = 3$  per group).

(D) Differentially expressed genes in the three mitral cell clusters (MC-1, MC-2, MC-3) between healthy mice and acute EAE mice ( $n = 3$  per group) in snRNA-Seq.

(E) Gating strategy of cell sorting of HuC/D++ nuclei for mitral cell enrichment.

(F) Relative expression of mitral cell-specific gene *Cdhr1* normalized to the input of olfactory bulb nuclei before cell sorting, measured by quantitative real time PCR.

(G) Relative expression of selected genes which were upregulated in the snRNA-seq data set, validated in HuC/D++ sorted nuclei by quantitative real time PCR.

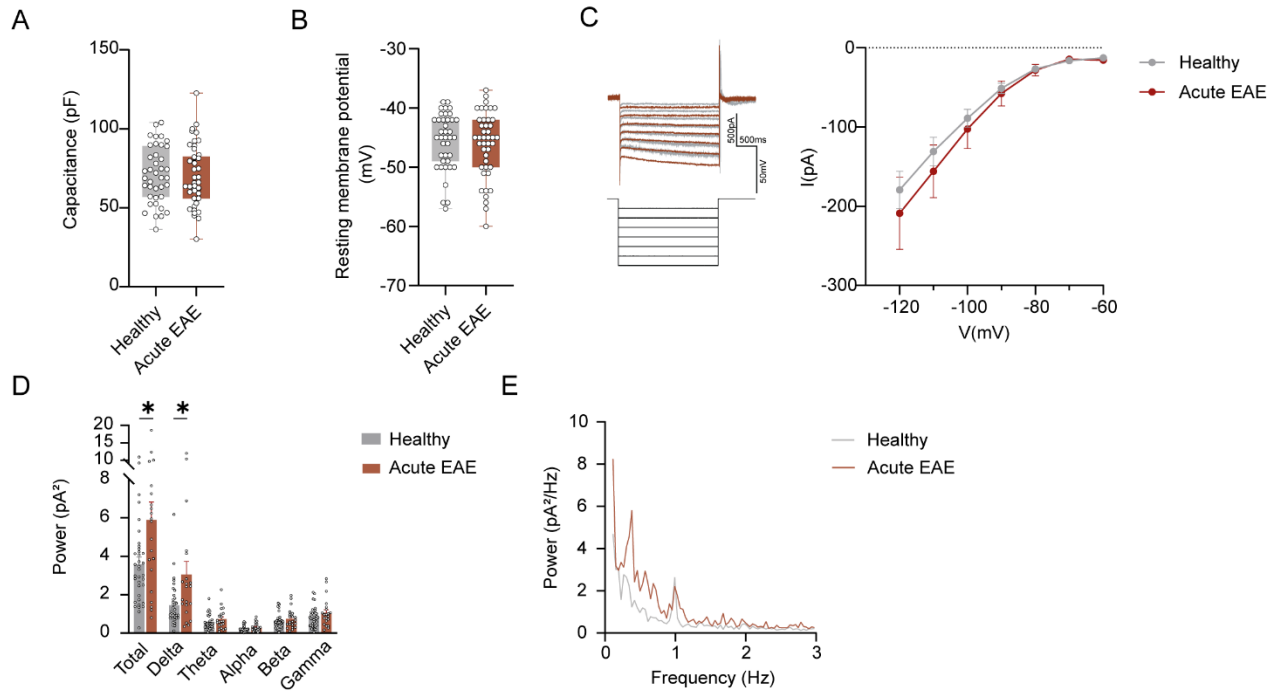

**Fig. S7 Intrinsic properties of mitral cells are perturbed during EAE demonstrated in whole clamp analyses.**

(A) Capacitance acquired by whole clamp analysis of mitral cells in healthy mice ( $n = 39$  cells,  $n = 25$ ) or acute EAE mice (d13–16 p.i.,  $n = 43$  cells,  $n = 20$ ).

(B) Resting membrane potential in healthy mice and acute EAE mice (d13–16 p.i.) in mitral cells of the olfactory bulb. Statistical analyses were performed using an unpaired t-test.

(C) Voltage step protocol to induce  $I_h$  in mitral cells. Representative traces and I/V plot in healthy mice ( $n = 9$  cells,  $n = 5$  animals) or acute EAE (d13–16 p.i.,  $n = 11$  cells,  $n = 5$  animals). Difference in evoked  $I_h$  inward current quantified as difference between current at beginning and at end of voltage step ( $-179 \pm 23$  pA in healthy mice vs.  $-221 \pm 45$  pA in EAE at  $V = -120$  mV) is not significant (student's t-test  $P = 0.58$ ).

(D) Average power as integral of the corresponding linear spectrograms in the following frequency bands: delta (0.1–3 Hz), theta (3–8 Hz), alpha (8–12 Hz), beta (12–30 Hz) and gamma (30–100 Hz) and in total over all frequencies in healthy ( $n = 38$  cells,  $n = 31$  animals) vs. acute EAE (d13–16 p.i.,  $n = 32$  cells,  $n = 12$  animals).

(E) Averaged linear spectrogram of healthy and EAE mitral cells in delta band (0.1–3 Hz) of the same cohort.

**Table S1. List of antibodies used in flow cytometry.**

| Antigen              | Supplier                 | Prod. no.  | RRID        | Species          | Flow cytometry |
|----------------------|--------------------------|------------|-------------|------------------|----------------|
| CD3ε FITC            | BioLegend                | 100306     | AB_312671   | Armenian Hamster | 1:100          |
| CD8α BV785           | BioLegend                | 100750     | AB_2562610  | Rat              | 1:200          |
| CD11b PerCP/Cy5.5    | BioLegend                | 101228     | AB_893233   | Rat              | 1:400          |
| CD11c PE/Cy7         | BioLegend                | 117318     | AB_493569   | Hamster          | 1:300          |
| CD19 BV650           | BioLegend                | 115541     | AB_11204087 | Rat              | 1:400          |
| CD45 Alexa Fluor 700 | BioLegend                | 103128     | AB_493715   | Rat              | 1:200          |
| CD317 APC            | BioLegend                | 127016     | AB_1967101  | Rat              | 1:100          |
| F4/80 BV421          | BioLegend                | 123137     | AB_11203717 | Rat              | 1:100          |
| I-A/I-E BV711        | BioLegend                | 107643     | AB_2565976  | Rat              | 1:400          |
| Ly6G APC/Cy7         | BioLegend                | 127623     | AB_10640819 | Rat              | 1:400          |
| NK1.1 PE             | Thermo Fisher Scientific | 12-5941-82 | AB_466050   | Mouse            | 1:300          |

Pacific Orange-NHS (Invitrogen. #P30253) used at 1 μM as viability stain.

**Table S2. Quality control of single-nucleus RNA-seq data set.**

| Cluster | Number of cells | Avg nCount RNA | Avg feature RNA | Avg percent mito |
|---------|-----------------|----------------|-----------------|------------------|
| 0       | 29547           | 4423.07        | 1762.62         | 0.007            |
| 1       | 11028           | 4239.20        | 1755.72         | 0.005            |
| 2       | 4657            | 5659.33        | 2152.65         | 0.008            |
| 3       | 4657            | 2423.02        | 1219.76         | 0.011            |
| 4       | 4269            | 4959.29        | 1839.11         | 0.005            |
| 5       | 3941            | 8757.45        | 2456.65         | 0.007            |
| 6       | 3863            | 11965.38       | 3101.45         | 0.013            |
| 7       | 2804            | 8098.22        | 2595.75         | 0.010            |
| 8       | 2377            | 3855.42        | 1597.18         | 0.017            |
| 9       | 2053            | 4533.45        | 1805.41         | 0.011            |
| 10      | 1780            | 7272.30        | 2498.09         | 0.007            |
| 11      | 1729            | 4477.86        | 1787.64         | 0.010            |
| 12      | 585             | 7531.91        | 2516.27         | 0.005            |
| 13      | 279             | 4627.94        | 1967.92         | 0.017            |
| 14      | 266             | 3436.44        | 1658.77         | 0.051            |
